# Supplementary material for: Acclimation Response and Ability of Growth and Photosynthesis of Terrestrial Cyanobacterium Cylindrospermum sp. Strain FS 64 Under Combined Environmental Factors
Source: Research Square preprint supplement (doi:10.21203/rs.3.rs-1004501/v1), 2021-10-28
Supplement: Supplementary file 1 [file 393fd04626ba85d0d3cd6416.docx]

**TABLE**

**Table 1.** Comparison of parameters of photosynthesis-irradiance curves (Pmax , the maximum photosynthetic rate (μmol O2 mg chl−1 h−1); α, photosynthetic efficiency (μmol O2 mg chl-1 h-1)/ (μmol photon m-2 s-1); Ik, light saturation point (µmquanta.m-2s-1)of *Cylindrospermum* sp. FS 64at different salinity and alkaline pHs after 72 hours of inoculation. Values are means of three independent biological replicates ± standard deviation.

| **Table 1.** | | | |
| --- | --- | --- | --- |
| NaCl (mM) | 17 | 80 | 160 |
| Pmax -pH 9 | 67.41±5.55 | 59.34±4.22 | 52.45±6.08 |
| Pmax -pH 11 | 54.41±3.05 | 74.34±6.66 | 34.45±3.18 |
| α -pH 9 | 0.84±0.04 | 0.85±0.06 | 0.61±0.16 |
| α -pH 11 | 0.74±0.02 | 0.87±0.04 | 0.65±0.1 |
| Ik -pH 9 | 390 | 280 | 520 |
| Ik -pH 11 | 260 | 120 | 440 |
